# Supplementary material
Source: publisher figshare collection journal article supplement (https://gsapubs.figshare.com/articles/dataset/_/21597705)
Supplement: Supplementary file 1 [file 1]

## Sheet: Sheet1
Table S2. Zircon U-Pb isotopic data for samples in this study
Spot no.	Contents		Ratios							Ages (Ma)						Con.
	Th	U	Th/U	207Pb/206Pb	1σ	207Pb/235U	1σ	206Pb/238U	1σ	207Pb/206Pb	1σ	207Pb/235U	1σ	206Pb/238U	1σ	%
20ZH01
1	203.6	296.25	0.687257	0.05543	0.0018	0.53476	0.01624	0.06997	0.00113	430	40	435	11	436	7	99.7706
2	310.05	322.93	0.960115	0.05621	0.00157	0.56009	0.01455	0.07227	0.00108	461	32	452	9	450	6	100.444
3	183.79	190.99	0.962302	0.05572	0.00223	0.5439	0.02043	0.0708	0.00132	441	51	441	13	441	8	100
4	222.11	244.58	0.908128	0.05682	0.00197	0.5412	0.01747	0.06908	0.0012	485	41	439	12	431	7	101.856
5	211.46	309.1	0.684115	0.05637	0.00252	0.56262	0.02339	0.07239	0.00157	467	54	453	15	451	9	100.443
6	258.46	530.28	0.487403	0.05671	0.00118	0.59188	0.01143	0.0757	0.00093	480	22	472	7	470	6	100.426
7	264.97	281.41	0.94158	0.05523	0.00164	0.54723	0.01522	0.07186	0.00106	422	36	443	10	447	6	99.1051
8	599.77	434.77	1.37951	0.05557	0.00136	0.54181	0.01234	0.07071	0.00094	435	28	440	8	440	6	100
9	607.94	686.73	0.885268	0.06418	0.00253	0.4225	0.01515	0.04775	0.00097	748	43	358	11	301	6	118.937
10	654.54	1367.3	0.47871	0.06309	0.00115	0.55426	0.00923	0.06371	0.00074	711	17	448	6	398	4	112.563
11	410.65	314.8	1.30448	0.05509	0.00155	0.55154	0.01446	0.07261	0.00106	416	33	446	9	452	6	98.6726
12	467.83	475.38	0.984118	0.05494	0.00138	0.52223	0.01218	0.06894	0.00092	410	29	427	8	430	6	99.3023
13	112.09	174.28	0.64316	0.05606	0.00226	0.55117	0.0207	0.0713	0.0014	455	49	446	14	444	8	100.45
14	491.27	778.77	0.630828	0.05647	0.00098	0.56997	0.00914	0.0732	0.00081	471	18	458	6	455	5	100.659
15	126.81	226.29	0.560387	0.05216	0.00182	0.53117	0.01736	0.07385	0.00125	292	44	433	12	459	8	94.3355
16	314.32	318.68	0.986319	0.05402	0.0016	0.53508	0.0148	0.07183	0.00108	372	36	435	10	447	6	97.3154
17	340.13	346.59	0.981361	0.05115	0.0015	0.5133	0.0141	0.07278	0.00108	248	37	421	9	453	6	92.936
18	135.43	205.87	0.657842	0.05574	0.00205	0.56186	0.01945	0.0731	0.00126	442	47	453	13	455	8	99.5604
19	198.07	221.05	0.896042	0.05464	0.00184	0.53282	0.01686	0.07071	0.00115	398	42	434	11	440	7	98.6364
20	312.65	320.15	0.976573	0.0539	0.0017	0.51129	0.01505	0.06878	0.0011	367	38	419	10	429	7	97.669
21	125.8	158.11	0.795649	0.05285	0.00261	0.5243	0.02432	0.07194	0.0016	322	65	428	16	448	10	95.5357
22	115.27	189.28	0.608992	0.05551	0.00208	0.54037	0.01891	0.07059	0.00128	433	46	439	12	440	8	99.7727
23	107.1	125.45	0.853727	0.05477	0.00277	0.54098	0.02576	0.07162	0.00163	403	66	439	17	446	10	98.4305
24	378.26	300.05	1.26066	0.05282	0.00168	0.51149	0.01522	0.07021	0.00109	321	40	419	10	437	7	95.881
20ZH14
1	141.41	240.48	0.588032	0.06133	0.00101	0.57044	0.00884	0.06746	0.00063	650.7	34.96	458.3	5.72	420.9	3.81	108.886
2	297.8	281.71	1.05712	0.05684	0.00095	0.57228	0.00909	0.07303	0.00067	485	19	459	6	454	4	101.101
3	356.3	358.91	0.992728	0.05562	0.0008	0.54129	0.00734	0.07059	0.00063	437	15	439	5	440	4	99.7727
4	203.51	239.45	0.849906	0.05633	0.00094	0.54985	0.00867	0.0708	0.00066	465	19	445	6	441	4	100.907
5	302.94	269.92	1.12233	0.05569	0.00087	0.5462	0.0081	0.07115	0.00064	440	18	443	5	443	4	100
6	285.49	291.91	0.978007	0.05745	0.00089	0.58638	0.00855	0.07404	0.00068	509	17	469	5	460	4	101.957
7	109.83	200.44	0.547945	0.05261	0.00099	0.51291	0.00926	0.07073	0.00066	312	24	420	6	441	4	95.2381
8	261.57	266.97	0.979773	0.05243	0.00089	0.51365	0.0083	0.07108	0.00065	304	21	421	6	443	4	95.0339
9	135.34	270.94	0.49952	0.05458	0.00078	0.53322	0.00713	0.07089	0.00063	395	15	434	5	442	4	98.19
10	289.47	274.05	1.05627	0.05643	0.00082	0.55745	0.0076	0.07168	0.00064	469	15	450	5	446	4	100.897
11	208.13	226.12	0.92044	0.05608	0.00086	0.54143	0.00788	0.07006	0.00063	456	17	439	5	437	4	100.458
12	294.54	298.77	0.985842	0.054	0.00081	0.53599	0.00763	0.07202	0.00064	371	17	436	5	448	4	97.3214
13	109.84	173.96	0.63141	0.05633	0.00103	0.5473	0.00957	0.0705	0.00066	465	23	443	6	439	4	100.911
14	161.65	188.48	0.857651	0.05572	0.00096	0.54346	0.00889	0.07077	0.00066	441	20	441	6	441	4	100
15	157.84	225.84	0.698902	0.05526	0.00088	0.5518	0.00827	0.07246	0.00066	423	18	446	5	451	4	98.8914
16	153.92	237.55	0.647948	0.0561	0.00083	0.55612	0.00771	0.07193	0.00064	456	16	449	5	448	4	100.223
17	292.23	297.54	0.982154	0.05525	0.00074	0.52768	0.00662	0.06929	0.0006	422	14	430	4	432	4	99.537
18	217.56	250.17	0.869649	0.05249	0.0008	0.49971	0.00722	0.06906	0.00061	307	18	412	5	430	4	95.814
19	178.33	215.83	0.826252	0.05407	0.00084	0.51967	0.00762	0.06973	0.00063	374	18	425	5	435	4	97.7011
20	324.52	298.98	1.08542	0.05427	0.00083	0.51941	0.00752	0.06943	0.00062	382	17	425	5	433	4	98.1524
21	309.33	312.57	0.989634	0.05475	0.00078	0.53871	0.0072	0.07137	0.00063	402	15	438	5	444	4	98.6486
22	151.07	154.96	0.974897	0.0579	0.00125	0.53785	0.01102	0.06738	0.00069	526	27	437	7	420	4	104.048
23	316.63	318.22	0.995003	0.05199	0.00068	0.51318	0.00632	0.07159	0.00061	285	14	421	4	446	4	94.3946
24	367.05	395.77	0.927433	0.0551	0.00064	0.52985	0.00575	0.06974	0.00059	416	11	432	4	435	4	99.3103
20ZH18
1	130.58	339.27	0.384885	0.05708	0.00177	0.54337	0.01578	0.06905	0.00106	495	38	441	10	430	6	102.558
2	268.56	522.32	0.514168	0.05731	0.00137	0.56155	0.01243	0.07107	0.00093	503	27	453	8	443	6	102.257
3	149.87	370.73	0.404256	0.05671	0.00196	0.54534	0.01759	0.06974	0.0012	480	42	442	12	435	7	101.609
4	101.43	259.96	0.390175	0.05568	0.00205	0.52333	0.01817	0.06816	0.00115	440	48	427	12	425	7	100.471
5	315.52	632.94	0.498499	0.05942	0.00118	0.57086	0.01049	0.06967	0.00083	583	21	459	7	434	5	105.76
6	434.44	786.01	0.552716	0.05784	0.00101	0.55207	0.00884	0.06922	0.00076	524	17	446	6	431	5	103.48
7	120.54	314.06	0.383812	0.0554	0.00172	0.53319	0.0155	0.06979	0.00106	428	38	434	10	435	6	99.7701
8	209.32	425.53	0.491904	0.05639	0.00151	0.54113	0.01349	0.06959	0.00097	468	31	439	9	434	6	101.152
9	514.31	877.04	0.586416	0.05643	0.00095	0.566	0.00885	0.07273	0.00079	469	17	455	6	453	5	100.442
10	230.36	495.53	0.464876	0.05729	0.00144	0.5731	0.01335	0.07253	0.00099	503	28	460	9	451	6	101.996
11	204.42	544.54	0.375399	0.05446	0.00117	0.53	0.01062	0.07056	0.00086	390	24	432	7	440	5	98.1818
12	189.15	503.89	0.37538	0.0551	0.00127	0.53834	0.01159	0.07084	0.0009	416	26	437	8	441	5	99.093
13	431.38	684.49	0.630221	0.05587	0.00108	0.53717	0.0096	0.06971	0.0008	447	21	437	6	434	5	100.691
14	194.99	388.56	0.501827	0.05603	0.00149	0.5392	0.01342	0.06977	0.00097	454	31	438	9	435	6	100.69
15	298.02	464.44	0.641676	0.05758	0.00142	0.57466	0.01319	0.07236	0.00097	513.4	53.56	461	8.5	450.4	5.84	102.353
16	266.6	689.53	0.38664	0.05676	0.00106	0.56066	0.00976	0.07161	0.00082	482	20	452	6	446	5	101.345
17	256.83	505.93	0.507639	0.05403	0.00117	0.55085	0.01115	0.07392	0.00091	372	24	446	7	460	5	96.9565
18	372.87	686.55	0.543107	0.05409	0.00104	0.53864	0.00965	0.07221	0.00082	375	21	438	6	449	5	97.5501
19	192.44	418.76	0.459547	0.05687	0.00136	0.55862	0.0125	0.07122	0.00094	486	27	451	8	444	6	101.577
20	232.99	459.77	0.506753	0.05295	0.00119	0.54681	0.01159	0.07488	0.00093	327	26	443	8	465	6	95.2688
21	151.74	411.69	0.368578	0.05449	0.00137	0.53098	0.01256	0.07066	0.00094	391	30	432	8	440	6	98.1818
22	239.78	546.9	0.438435	0.05555	0.00119	0.53273	0.01068	0.06954	0.00086	434	24	434	7	433	5	100.231
23	172.55	387.42	0.445382	0.0549	0.00135	0.54421	0.01249	0.07189	0.00096	408	28	441	8	448	6	98.4375
24	102.63	508.2	0.201948	0.055	0.0012	0.54197	0.01106	0.07145	0.00089	412	24	440	7	445	5	98.8764
20ZH30
1	73.33	118.27	0.620022	0.05698	0.00145	0.57103	0.0136	0.07267	0.00095	491	30	459	9	452	6	101.549
2	70.61	153.91	0.458775	0.0583	0.0012	0.58782	0.01126	0.07311	0.00087	541	22	469	7	455	5	103.077
3	72.53	139.44	0.520152	0.0528	0.00124	0.51115	0.01141	0.0702	0.00082	320	30	419	8	437	5	95.881
4	54.1	113.74	0.475646	0.05837	0.00153	0.54066	0.01317	0.06717	0.00093	544	30	439	9	419	6	104.773
5	146.42	262.91	0.556921	0.05687	0.00085	0.53281	0.00737	0.06793	0.00068	486	15	434	5	424	4	102.358
6	76.97	171.2	0.449591	0.05588	0.00109	0.53224	0.00966	0.06907	0.00076	448	22	433	6	431	5	100.464
7	215.13	225.42	0.954352	0.05492	0.00091	0.52014	0.00795	0.06868	0.00071	409	17	425	5	428	4	99.2991
8	91.36	195.28	0.467841	0.05455	0.00105	0.51644	0.00929	0.06865	0.00075	394	22	423	6	428	5	98.8318
9	50.77	119.54	0.424711	0.05559	0.00134	0.53569	0.01217	0.06988	0.00085	436	29	436	8	435	5	100.23
10	60.66	112.45	0.53944	0.0623	0.00142	0.59795	0.0128	0.06961	0.00082	684	26	476	8	434	5	109.677
11	82.97	176.28	0.470672	0.05676	0.00116	0.5395	0.01024	0.06894	0.00078	482	23	438	7	430	5	101.86
12	114.53	245.22	0.46705	0.05829	0.00089	0.56533	0.00799	0.07034	0.00071	541	15	455	5	438	4	103.881
13	77.7	174.27	0.44586	0.0613	0.0012	0.55467	0.01004	0.06563	0.00076	650	20	448	7	410	5	109.268
14	135.39	189.52	0.714384	0.0561	0.0012	0.54234	0.01085	0.07012	0.00082	456	24	440	7	437	5	100.686
15	72.97	159.15	0.458498	0.05939	0.00116	0.5582	0.01021	0.06818	0.00075	581	21	450	7	425	5	105.882
16	62.53	118.25	0.528795	0.05675	0.00134	0.55345	0.01234	0.07074	0.00086	482	28	447	8	441	5	101.361
17	96.7	206.4	0.468508	0.05595	0.001	0.52275	0.00863	0.06781	0.00072	450	19	427	6	423	4	100.946
18	89.36	144.36	0.619008	0.06313	0.00131	0.58068	0.01127	0.06677	0.00076	713	23	465	7	417	5	111.511
19	110.17	207.02	0.532171	0.05725	0.00103	0.55107	0.00918	0.06988	0.00074	501	19	446	6	435	4	102.529
20	92.94	176.55	0.526423	0.05921	0.0013	0.58527	0.01198	0.07177	0.00088	575	24	468	8	447	5	104.698
21	211.91	268.7	0.788649	0.05983	0.00105	0.56477	0.00921	0.06854	0.00072	597	18	455	6	427	4	106.557
22	89.09	134.8	0.660905	0.05691	0.00143	0.55071	0.013	0.07026	0.00089	488	30	445	9	438	5	101.598
23	97.24	184.9	0.525906	0.05819	0.00112	0.5584	0.00993	0.06969	0.00077	537	21	450	6	434	5	103.687
24	116.09	208.36	0.557161	0.06113	0.00112	0.57419	0.00971	0.06822	0.00075	644	19	461	6	425	5	108.471
21ZH10
1	401.76	482.42	0.832801	0.05831	0.00128	0.5667	0.0115	0.07081	0.0009	540.6	47.96	455.9	7.46	441.1	5.43	103.355
2	714.62	590.83	1.20952	0.0572	0.0016	0.53008	0.01372	0.06751	0.00101	498.7	60.99	431.9	9.1	421.1	6.12	102.565
3	63.49	126.39	0.502334	0.05755	0.00324	0.58651	0.03077	0.07422	0.00199	512.5	119.48	468.6	19.69	461.6	11.92	101.516
4	172.51	298.46	0.578	0.05886	0.00169	0.56218	0.01508	0.06956	0.00101	561.8	61.31	452.9	9.8	433.5	6.11	104.475
5	182.41	298.34	0.611417	0.05877	0.00162	0.57338	0.01461	0.07104	0.00106	558.6	58.97	460.2	9.43	442.4	6.4	104.024
6	171.28	291.66	0.587259	0.05942	0.00159	0.59783	0.0149	0.07325	0.00105	582.3	57.18	475.9	9.47	455.7	6.33	104.433
7	251.05	372.02	0.674829	0.05725	0.00141	0.56598	0.01299	0.07196	0.00095	500.5	53.78	455.4	8.43	448	5.73	101.652
8	219.56	310.18	0.707847	0.05669	0.00159	0.54873	0.0143	0.07045	0.00104	478.6	60.87	444.2	9.37	438.9	6.28	101.208
9	390.07	560.36	0.696106	0.06357	0.00118	0.63464	0.01088	0.07265	0.00085	727.2	39.02	499	6.76	452.1	5.1	110.374
10	409.86	643.53	0.636893	0.05693	0.00108	0.56323	0.00983	0.07197	0.00084	488.2	41.43	453.6	6.38	448	5.04	101.25
11	71.86	189	0.380212	0.05714	0.00195	0.56923	0.01815	0.07241	0.00123	496.3	74.07	457.5	11.74	450.6	7.4	101.531
12	333.11	392.06	0.84964	0.05505	0.00179	0.51337	0.01557	0.06776	0.0011	414.3	70.53	420.7	10.45	422.6	6.64	99.5504
13	209.39	291.37	0.71864	0.06855	0.00222	0.66555	0.01978	0.07054	0.00125	885.2	65.61	518	12.06	439.4	7.54	117.888
14	259.51	353.13	0.734885	0.05379	0.00148	0.5119	0.0132	0.06913	0.00097	362	60.97	419.7	8.87	430.9	5.86	97.4008
15	172.47	331.16	0.520806	0.05865	0.00148	0.56925	0.0133	0.07049	0.00099	554.1	54.28	457.5	8.61	439.1	5.96	104.19
16	116.91	122.11	0.957415	0.06792	0.00212	1.25008	0.03688	0.13362	0.00242	866.2	63.5	823.4	16.64	808.5	13.74	101.843
17	512.08	596.91	0.857885	0.06023	0.00113	0.57388	0.00991	0.06916	0.00081	611.9	40.09	460.5	6.4	431.1	4.87	106.82
18	196.54	229.35	0.856944	0.05558	0.00187	0.50472	0.01578	0.06591	0.0011	435.3	73.05	414.9	10.65	411.4	6.68	100.851
19	233.78	350.7	0.66661	0.05605	0.00137	0.55389	0.01259	0.0717	0.00097	453.9	53.43	447.5	8.23	446.4	5.85	100.246
20	209.59	346.84	0.604284	0.05661	0.00136	0.56395	0.01264	0.07227	0.00096	475.6	52.76	454.1	8.21	449.8	5.75	100.956
21	252.6	379.19	0.666157	0.05677	0.00132	0.54724	0.01185	0.06985	0.00091	481.8	50.9	443.2	7.78	435.2	5.47	101.838
22	542.27	595.97	0.909895	0.05642	0.00113	0.51929	0.00966	0.06667	0.00078	468.2	44.2	424.7	6.45	416.1	4.74	102.067
23	226.26	387.01	0.584636	0.05396	0.00139	0.48361	0.01168	0.06491	0.00087	369	57.1	400.5	8	405.4	5.27	98.7913
24	276.12	408.14	0.676533	0.05545	0.00127	0.53301	0.01137	0.0696	0.00089	430	49.93	433.8	7.53	433.8	5.39	100
25	306.36	459.19	0.667175	0.05362	0.00114	0.53053	0.01047	0.07163	0.00087	354.8	47.25	432.2	6.94	446	5.21	96.9058
26	82.1	273.53	0.30015	0.05633	0.00179	0.48216	0.01434	0.06195	0.00096	464.5	69.2	399.6	9.82	387.5	5.83	103.123
27	291.66	417	0.699424	0.06382	0.0013	0.64403	0.01213	0.07301	0.0009	735.7	42.69	504.8	7.49	454.3	5.42	111.116
28	304.52	386.03	0.788851	0.05894	0.00154	0.56475	0.01362	0.06931	0.001	564.8	55.87	454.6	8.84	432	6.04	105.231
29	217.08	288.34	0.752861	0.05482	0.00154	0.52524	0.01377	0.06929	0.00101	404.7	61.01	428.6	9.17	431.9	6.12	99.2359
30	192.19	291.98	0.65823	0.05528	0.00152	0.54412	0.01398	0.07116	0.00102	423.3	59.75	441.1	9.19	443.2	6.14	99.5262
21ZH14
1	37.64	90.39	0.416418	0.05787	0.00133	0.61664	0.01325	0.07738	0.00097	524.6	49.9	487.7	8.32	480.5	5.81	101.498
2	55.59	107.01	0.519484	0.0575	0.00142	0.60005	0.01383	0.07579	0.00101	510.3	53.8	477.3	8.77	470.9	6.04	101.359
3	98.2	205.57	0.477696	0.05685	0.0008	0.58986	0.00764	0.07535	0.00075	484.9	31.14	470.8	4.88	468.3	4.47	100.534
4	53.14	101.65	0.522774	0.05932	0.00141	0.62156	0.01366	0.0761	0.00104	578.7	50.96	490.8	8.56	472.8	6.22	103.807
5	105.33	163.21	0.645365	0.0563	0.0035	0.57578	0.03348	0.07426	0.00214	463.6	132.98	461.7	21.58	461.8	12.83	99.9783
6	66.67	167.04	0.399126	0.05673	0.00087	0.61681	0.00874	0.07895	0.00081	480.5	33.88	487.8	5.49	489.8	4.83	99.5917
7	57.95	120.48	0.480993	0.05656	0.00103	0.61579	0.0104	0.07906	0.00088	473.6	40.14	487.2	6.54	490.5	5.24	99.3272
8	158.45	185.12	0.855931	0.05716	0.00092	0.63512	0.00938	0.08068	0.00086	497.1	35.02	499.3	5.82	500.2	5.13	99.8201
9	87.51	193.7	0.451781	0.0574	0.0012	0.60375	0.01165	0.07637	0.00094	506.6	45.73	479.6	7.38	474.4	5.66	101.096
10	61.82	153.3	0.403262	0.05746	0.00094	0.60844	0.00915	0.07689	0.00082	508.8	35.92	482.6	5.78	477.5	4.93	101.068
11	63.26	144.75	0.437029	0.05539	0.00095	0.62632	0.01002	0.0821	0.00088	427.6	37.4	493.8	6.25	508.6	5.26	97.0901
12	44.65	113.9	0.392011	0.06036	0.00169	0.63315	0.01641	0.07615	0.00117	616.5	59.45	498.1	10.2	473.1	7	105.284
13	37.39	89.53	0.417625	0.05617	0.00121	0.59613	0.01203	0.07705	0.00092	458.6	47.05	474.8	7.65	478.5	5.5	99.2268
14	61.66	130.27	0.473325	0.05668	0.00123	0.58639	0.0119	0.0751	0.00092	478.3	47.85	468.6	7.61	466.8	5.53	100.386
15	55.18	113.22	0.48737	0.05744	0.00141	0.61855	0.01419	0.07816	0.00102	508.2	53.41	488.9	8.9	485.1	6.1	100.783
16	86.38	179.09	0.482327	0.0564	0.00085	0.60616	0.00836	0.07802	0.0008	467.2	33.1	481.1	5.28	484.3	4.78	99.3393
17	105.12	196.54	0.534853	0.05734	0.0008	0.61186	0.00781	0.07745	0.00077	504.2	30.3	484.7	4.92	480.9	4.62	100.79
18	61.68	166.78	0.369829	0.05608	0.0009	0.60608	0.00901	0.07845	0.00082	455	35.01	481.1	5.69	486.8	4.91	98.8291
19	43.07	99.29	0.43378	0.057	0.00117	0.59578	0.01141	0.07586	0.0009	490.9	44.83	474.6	7.26	471.4	5.39	100.679
20	162.63	230.97	0.704117	0.05641	0.00094	0.57018	0.00873	0.07335	0.00079	467.9	36.73	458.1	5.64	456.3	4.76	100.394
21	89.5	171.33	0.522384	0.0553	0.00133	0.5486	0.01225	0.07197	0.00096	424.3	52.38	444.1	8.03	448	5.8	99.1295
22	101.05	205.28	0.492254	0.05585	0.00089	0.59021	0.00868	0.07667	0.0008	445.9	34.63	471	5.54	476.2	4.79	98.908
23	57.68	103.74	0.556005	0.05768	0.00171	0.64726	0.01798	0.08141	0.00122	517.4	64	506.8	11.08	504.5	7.28	100.456
24	74.89	129.43	0.578614	0.057	0.00104	0.59391	0.01005	0.07558	0.00083	491.1	39.86	473.4	6.4	469.7	5	100.788
25	70.27	89.14	0.788311	0.05672	0.00118	0.63635	0.01238	0.08137	0.00095	480.1	45.63	500	7.68	504.3	5.65	99.1473
26	194.6	278	0.7	0.056	0.0007	0.55671	0.00637	0.0721	0.00069	452.2	27.3	449.4	4.16	448.8	4.13	100.134
27	52.76	100.18	0.526652	0.05694	0.00147	0.59166	0.01418	0.07537	0.00106	488.5	56.67	471.9	9.04	468.4	6.36	100.747
28	62.27	116.97	0.532359	0.10021	0.00172	1.16177	0.01771	0.08408	0.00104	1628	31.59	782.8	8.32	520.4	6.2	150.423
29	78.41	221.92	0.353326	0.05715	0.00076	0.57429	0.00694	0.07287	0.00071	496.8	29.24	460.8	4.48	453.4	4.29	101.632
30	146.55	270.38	0.542015	0.05519	0.00077	0.54649	0.00698	0.0718	0.00072	419.9	30.76	442.7	4.58	447	4.32	99.038
21ZH48
1	237.57	872.88	0.272168	0.08279	0.00077	0.70965	0.00576	0.06215	0.00056	1264.2	17.99	544.5	3.42	388.7	3.39	140.082
2	1534.16	1064.41	1.44132	0.07243	0.00076	0.71807	0.00667	0.07189	0.00067	998.1	21.17	549.5	3.94	447.5	4	122.793
3	77.17	789.6	0.097733	0.06908	0.00228	0.66645	0.02008	0.06996	0.00128	901	66.71	518.5	12.23	435.9	7.74	118.949
4	160.05	703.76	0.227421	0.10226	0.00106	3.92083	0.03815	0.27801	0.00287	1665.6	19.02	1618	7.87	1581.3	14.49	102.321
5	525.76	1024.37	0.513252	0.1207	0.00188	1.14947	0.01534	0.06906	0.00084	1966.5	27.5	777	7.25	430.5	5.06	180.488
6	98.79	693.19	0.142515	0.09919	0.00065	1.97834	0.01097	0.14463	0.00121	1608.9	12.15	1108.2	3.74	870.8	6.8	127.262
7	52.57	404.71	0.129895	0.05736	0.00095	0.60355	0.00921	0.0763	0.00083	504.9	35.91	479.5	5.83	474	4.95	101.16
8	192.61	391.26	0.492281	0.11517	0.00085	5.32405	0.0361	0.33522	0.00303	1882.5	13.28	1872.7	5.8	1863.6	14.62	100.488
9	244.97	426.96	0.573754	0.09799	0.00173	1.43021	0.02258	0.10584	0.00137	1586.2	32.64	901.6	9.43	648.5	8.01	139.029
10	341.89	551.82	0.619568	0.10909	0.00158	3.40897	0.04621	0.22659	0.00284	1784.2	26.16	1506.5	10.64	1316.6	14.95	114.424
11	88.67	188.69	0.469924	0.11828	0.00084	5.70665	0.03673	0.34985	0.00311	1930.4	12.62	1932.4	5.56	1933.9	14.86	99.9224
12	163.9	338.1	0.484768	0.11256	0.00075	3.97133	0.02304	0.25583	0.00219	1841.2	11.98	1628.4	4.7	1468.5	11.23	110.889
13	393.97	1143.12	0.344644	0.08278	0.00055	1.55348	0.00876	0.13609	0.00113	1263.9	12.67	951.9	3.48	822.5	6.43	115.733
14	143.36	669.46	0.214143	0.06052	0.00126	0.51985	0.00991	0.06229	0.00078	622	44.42	425	6.62	389.5	4.74	109.114
15	39.35	503.38	0.0781716	0.06046	0.00065	0.56332	0.00538	0.06756	0.00062	620.2	22.85	453.7	3.5	421.4	3.72	107.665
16	37.56	897.21	0.0418631	0.0587	0.00053	0.59313	0.0048	0.07327	0.00064	556	19.75	472.9	3.06	455.8	3.84	103.752
17	84.42	525.75	0.160571	0.10907	0.00089	4.66699	0.03532	0.31029	0.00291	1783.8	14.86	1761.3	6.33	1742.1	14.3	101.102
18	1.44	132.95	0.0108311	0.05665	0.00147	0.56487	0.01355	0.07231	0.00101	477.1	56.42	454.7	8.79	450.1	6.09	101.022
19	303.99	711	0.427553	0.0763	0.00091	0.75452	0.00795	0.0717	0.0007	1103.1	23.56	570.8	4.6	446.4	4.22	127.867
20	56.58	400.41	0.141305	0.11455	0.00069	5.27277	0.02728	0.33379	0.00279	1872.8	10.77	1864.5	4.42	1856.7	13.48	100.42
21	717.49	542.75	1.32195	0.05611	0.00055	0.58129	0.00515	0.07512	0.00066	456.5	21.38	465.3	3.31	466.9	3.98	99.6573
22	246.85	390.9	0.631491	0.09039	0.00224	2.23376	0.05182	0.17919	0.00314	1433.8	46.59	1191.7	16.27	1062.6	17.14	112.149
23	105.95	434.22	0.244001	0.15139	0.00088	7.47857	0.03723	0.35821	0.00299	2361.7	9.88	2170.4	4.46	1973.7	14.19	109.966
24	139	350.56	0.396508	0.08269	0.00074	1.70938	0.01375	0.1499	0.00137	1262	17.32	1012.1	5.15	900.4	7.66	112.406
25	99.56	607.6	0.163858	0.06287	0.00056	0.62835	0.00495	0.07247	0.00063	703.9	18.87	495.1	3.09	451	3.8	109.778
26	152.05	433.7	0.350588	0.07906	0.00059	2.02665	0.01326	0.18588	0.0016	1173.8	14.6	1124.5	4.45	1099	8.71	102.32
27	235.54	454.78	0.517921	0.13503	0.00105	6.39729	0.0461	0.34354	0.00323	2164.4	13.47	2031.9	6.33	1903.7	15.5	106.734
28	61.13	604.7	0.101091	0.05697	0.00077	0.55006	0.00675	0.07002	0.00069	489.6	29.89	445	4.42	436.3	4.18	101.994
29	152.88	251.09	0.608865	0.11618	0.00099	5.15005	0.04101	0.32146	0.0031	1898.2	15.23	1844.4	6.77	1796.8	15.12	102.649
30	193.61	250.11	0.774099	0.07968	0.00062	2.23935	0.01571	0.20381	0.00179	1189	15.41	1193.5	4.92	1195.7	9.59	99.816
31	346.41	801.35	0.432283	0.09311	0.00079	0.96625	0.00709	0.07525	0.00067	1490.1	16.07	686.5	3.66	467.7	4.01	146.782
32	231.59	730.02	0.317238	0.06321	0.00065	0.63556	0.00588	0.07291	0.00066	715.3	21.83	499.6	3.65	453.7	3.99	110.117
33	324.11	357.53	0.906525	0.06015	0.00079	0.6832	0.00822	0.08236	0.00082	609.1	28.3	528.7	4.96	510.2	4.86	103.626
34	179.19	228.32	0.78482	0.05631	0.00112	0.60138	0.01107	0.07745	0.00092	463.9	43.77	478.1	7.02	480.9	5.49	99.4178
35	3.32	111.13	0.0298749	0.05786	0.00124	0.56975	0.0114	0.07141	0.00085	524	46.65	457.9	7.37	444.7	5.14	102.968
36	132.71	324.94	0.408414	0.1156	0.00082	4.83801	0.03071	0.30349	0.00269	1889.3	12.66	1791.5	5.34	1708.6	13.29	104.852
37	1.26	242.74	0.00519074	0.05747	0.00136	0.6104	0.0134	0.07702	0.00103	509.3	51.67	483.8	8.45	478.3	6.16	101.15
40	38.72	46.85	0.826467	0.10744	0.00171	4.61535	0.07153	0.31152	0.00433	1756.4	28.7	1752	12.94	1748.2	21.28	100.217
41	311.44	440.66	0.706758	0.10584	0.00126	4.4761	0.05147	0.30668	0.00352	1729	21.77	1726.6	9.54	1724.4	17.36	100.128
42	319.76	631.5	0.50635	0.12527	0.00086	4.67035	0.02837	0.27037	0.00237	2032.6	12.1	1761.9	5.08	1542.7	12.03	114.209
43	308.61	1114.81	0.276827	0.08167	0.00128	1.95243	0.02849	0.17336	0.0021	1237.6	30.5	1099.3	9.8	1030.6	11.56	106.666
44	456.4	771.77	0.591368	0.08706	0.00105	2.1864	0.02414	0.18213	0.00192	1361.7	22.95	1176.7	7.69	1078.6	10.49	109.095
45	343.6	310.46	1.10674	0.1019	0.00197	2.09102	0.03689	0.14881	0.00216	1659.1	35.37	1145.9	12.12	894.3	12.1	128.134
46	326.3	415.24	0.785811	0.11497	0.00075	3.43124	0.01923	0.21644	0.00184	1879.4	11.66	1511.6	4.41	1263	9.77	119.683
47	82.2	474.83	0.173115	0.10034	0.00198	3.23554	0.06069	0.23385	0.00364	1630.4	36.2	1465.7	14.55	1354.7	19.04	108.194
48	195.06	432.47	0.451037	0.11546	0.00083	4.74486	0.03061	0.29804	0.00266	1887	12.83	1775.2	5.41	1681.6	13.2	105.566
49	77.31	481.15	0.160678	0.14815	0.00094	7.54244	0.04253	0.36921	0.00321	2324.7	10.8	2178	5.06	2025.7	15.11	107.518
50	156.37	819.55	0.1908	0.11276	0.00067	3.66002	0.01843	0.23539	0.00196	1844.4	10.7	1562.7	4.02	1362.7	10.21	114.677
51	128.25	156.85	0.81766	0.09398	0.00099	2.71482	0.02633	0.2095	0.00211	1507.7	19.78	1332.5	7.2	1226.2	11.24	108.669
52	26.78	467.44	0.0572908	0.11731	0.00098	5.61564	0.04431	0.34717	0.00336	1915.6	14.95	1918.5	6.8	1921.1	16.07	99.8647
53	19.63	680.56	0.0288439	0.0596	0.00129	0.60052	0.01191	0.07307	0.00094	589.2	46.13	477.6	7.55	454.6	5.64	105.059
54	624.6	419.06	1.49048	0.08739	0.00072	1.71143	0.01253	0.14203	0.00127	1369	15.88	1012.8	4.69	856.1	7.17	118.304
55	240.05	695.95	0.344924	0.06093	0.00122	0.57191	0.0105	0.06808	0.00084	636.6	42.67	459.2	6.78	424.6	5.08	108.149
56	185.8	217.02	0.856142	0.1047	0.00127	2.84871	0.0317	0.19732	0.00217	1709	22.1	1368.5	8.36	1160.9	11.7	117.883
57	447.65	872.43	0.513107	0.14581	0.00088	7.8722	0.0422	0.39156	0.00335	2297.3	10.39	2216.5	4.83	2130	15.53	104.061
58	269.01	415.96	0.646721	0.10601	0.00126	3.92998	0.04435	0.26886	0.00304	1731.9	21.7	1619.9	9.13	1535	15.42	105.531
59	156.93	271.63	0.577734	0.10262	0.00122	1.73221	0.01826	0.12241	0.00128	1672.1	21.77	1020.6	6.79	744.4	7.38	137.104
61	366.13	1363.22	0.268577	0.0898	0.00083	1.81443	0.01498	0.14653	0.00137	1421.3	17.57	1050.7	5.4	881.5	7.7	119.195
62	44.73	470.41	0.0950873	0.1035	0.0019	1.39859	0.02285	0.098	0.00132	1687.8	33.57	888.3	9.67	602.7	7.76	147.387
63	466.28	603.81	0.77223	0.10468	0.00129	2.68612	0.03025	0.18609	0.00206	1708.8	22.47	1324.6	8.33	1100.2	11.21	120.396
64	66.23	352.86	0.187695	0.07158	0.00125	1.21291	0.01944	0.12289	0.0015	974	35.11	806.5	8.92	747.2	8.59	107.936
66	3.76	194.83	0.0192989	0.06007	0.00116	0.60329	0.01067	0.07284	0.00087	606	41.13	479.3	6.76	453.2	5.21	105.759
67	143.84	306.84	0.468779	0.12359	0.00077	6.17348	0.03434	0.36228	0.00312	2008.7	11.05	2000.7	4.86	1993	14.75	100.386
68	264.92	1075.2	0.246391	0.10649	0.00065	1.7592	0.00903	0.11982	0.001	1740.1	11.24	1030.6	3.32	729.5	5.74	141.275
69	215.76	523.02	0.412527	0.05781	0.00279	0.56724	0.02531	0.07116	0.00172	522.5	102.74	456.2	16.4	443.1	10.36	102.956
70	252.97	474.44	0.533197	0.06096	0.0011	0.72235	0.01196	0.08595	0.001	637.7	38.29	552.1	7.05	531.5	5.95	103.876
71	197.89	615.07	0.321736	0.09732	0.00129	1.93363	0.02322	0.1441	0.00161	1573.4	24.66	1092.8	8.04	867.8	9.09	125.928
72	159.59	1106.52	0.144227	0.0984	0.00111	0.97171	0.0095	0.07162	0.00071	1594	20.85	689.3	4.89	445.9	4.29	154.586
74	66.53	186.08	0.357534	0.11572	0.00094	5.40242	0.0409	0.3386	0.00322	1891.1	14.5	1885.2	6.49	1879.9	15.5	100.282
75	92.18	219.59	0.419782	0.12622	0.00123	6.51293	0.06158	0.37426	0.004	2045.9	17.07	2047.6	8.32	2049.4	18.78	99.9122
76	134.92	615.64	0.219154	0.09725	0.00096	1.8848	0.01655	0.14056	0.00136	1572.1	18.34	1075.8	5.82	847.8	7.67	126.893
77	191.03	523.99	0.364568	0.08618	0.00077	1.00448	0.00779	0.08454	0.00076	1342.1	17.1	706.1	3.95	523.2	4.54	134.958
78	76.92	282.73	0.272062	0.09874	0.00081	2.58142	0.01897	0.18962	0.00173	1600.4	15.27	1295.4	5.38	1119.3	9.38	115.733
79	127.55	225.19	0.566411	0.11624	0.00087	4.89218	0.03355	0.30526	0.00279	1899.1	13.43	1800.9	5.78	1717.4	13.78	104.862
80	88.45	574.41	0.153984	0.05604	0.00179	0.53916	0.0159	0.06979	0.00117	453.4	69.45	437.9	10.49	434.9	7.05	100.69
81	58.53	366.55	0.159678	0.07292	0.00066	0.90268	0.00727	0.08978	0.0008	1011.8	18.3	653.2	3.88	554.3	4.76	117.842
82	20.63	253.46	0.0813935	0.05758	0.0015	0.575	0.0138	0.07243	0.00105	513.5	56.45	461.2	8.9	450.8	6.28	102.307
83	181.82	554.48	0.327911	0.12931	0.00081	4.25039	0.02302	0.2384	0.00204	2088.7	10.99	1683.8	4.45	1378.4	10.6	122.156
84	15.39	601.77	0.0255746	0.05896	0.00069	0.54389	0.00578	0.06691	0.00064	565.7	25.4	441	3.8	417.5	3.84	105.629
85	89.99	526.78	0.17083	0.06155	0.00087	0.769	0.00992	0.09063	0.00094	658.4	29.98	579.2	5.69	559.2	5.56	103.577
86	210.18	577.09	0.364207	0.08045	0.00075	1.95945	0.01661	0.17666	0.00166	1208.1	18.3	1101.7	5.7	1048.7	9.08	105.054
87	226.28	760.31	0.297615	0.10546	0.00066	4.13163	0.02243	0.28417	0.00241	1722.3	11.38	1660.6	4.44	1612.4	12.12	102.989
88	73.53	396.66	0.185373	0.068	0.00153	0.82975	0.0171	0.0885	0.00123	868.6	45.94	613.5	9.49	546.7	7.27	112.219
89	99.98	527.8	0.189428	0.11333	0.00067	5.18702	0.02682	0.33199	0.0028	1853.4	10.71	1850.5	4.4	1848	13.55	100.135
90	130.87	707.18	0.185059	0.06272	0.00088	0.57445	0.00725	0.06643	0.00068	698.7	29.44	460.9	4.68	414.6	4.12	111.167
