# Supplementary material
Source: publisher figshare collection journal article supplement (https://gsapubs.figshare.com/articles/dataset/_/21597705)
Supplement: Supplementary file 1 [file 1]

Hao Zeng, Dongfang Song, Wenjiao Xiao, and Puqing Li, 2022, Accretion of an early Paleozoic Alaska-type arc onto northern North China: Implications for continental growth of the Central Asian orogenic belt: GSA Bulletin, <https://doi.org/10.1130/B36594.1>.

## Supplemental Material

**Text.** Analytical Methods.

**Table S1.** Major and trace element compositions for blocks from the ophiolitic mélanges in the western Ganqimaodu area.

**Table S2.** Zircon U-Pb isotopic data for samples in this study.

**Table S3.** Zircon Lu-Hf isotopic data for the early Paleozoic plutons in the Ganqimaodu area.

## **Analytical methods**

### ***1. Whole rock major and trace elements analysis***

Whole-rock major element compositions were analyzed by X-ray fluorescence (XRF-1500) at the Institute of Geology and Geophysics, Chinese Academy of Sciences (IGGCAS), Beijing, China. Analytical precision is generally better than 1%. Whole-rock trace elements were analyzed using inductively coupled plasma-mass spectrometry (ICP-MS) at the ALS Chemex Co., Ltd, Guangzhou, China. The accuracy of analyses is better than 5%.

### ***2. Zircon U-Pb dating***

Zircon grains were picked out by magnetic and heavy liquid methods. They were hand-picked under a binocular microscope and mounted on adhesive tape, then enclosed in epoxy resin and polished about 1/2 of their thickness. Cathodoluminescence (CL) imaging for zircon grain was operated with a scanning electron microscope to reveal their internal texture at the IGGCAS. Zircons from all samples were dated using an Agilent 7500a Quadrupole-ICP-MS with a GeoLasHD 193 nm ArF excimer laser ablation system at the IGGCAS. Each analysis spot has a 32  $\mu\text{m}$  diameter and the density of energy of 4.0 J/cm<sup>2</sup> at 71.8 mJ output of energy. The zircon 91500 was used as external standard for age calculation. External standards for concentration calculation are NIST SRM 610 and ARM. The more details about the instrumental settings and analytical procedures can be found in [Wu et al. \(2007\)](#) and [Xie et al. \(2008\)](#). The GLITTER program (Macquarie University) was used to calculate isotopic concentrations and ratios. Common Pb was corrected by the method proposed by [Andersen \(2002\)](#). Concordant diagrams were made using ISOPLOT 3.0 ([Ludwig, 2003](#)). The plot of probability density and histogram were produced by DensityPlotter 7.2 ([Vermeesch, 2012](#)). In this paper,  $^{206}\text{Pb}/^{238}\text{U}$  ages are reported for zircons younger than 1000 Ma, while  $^{207}\text{Pb}/^{206}\text{Pb}$  ages are reported for zircons older than 1000 Ma.

### ***3. Zircon Lu-Hf isotopic analysis***

Zircon Lu-Hf isotope analysis was operated near the site where U-Pb analyses were performed, by a Resolution SE 193 laser-ablation system attached to a Thermo Fisher Scientific Neptune Plus MC-ICP-MS at Beijing ZKKY Technology Co., Ltd. All zircons have a beam diameter of 44  $\mu\text{m}$ , a repetition of 10 Hz and the density of energy of 8 J/cm<sup>2</sup>. Details

for instrumental conditions and data acquisition protocols can be found in [Hou et al. \(2007\)](#). Zircon GJ-1 with a weighted mean  $^{176}\text{Hf}/^{177}\text{Hf}$  ratio of  $0.282006 \pm 21$  was used as the reference standard. The initial  $^{176}\text{Hf}/^{177}\text{Hf}$  ratios were calculated by measured  $^{176}\text{Lu}/^{177}\text{Hf}$  ratios and the  $^{176}\text{Lu}$  decay constant of  $1.867 \times 10^{-11} \text{ yr}^{-1}$  ([Söderlund et al., 2004](#)). The present chondritic values of  $^{176}\text{Hf}/^{177}\text{Hf} = 0.282772$  and  $^{176}\text{Lu}/^{177}\text{Hf} = 0.0332$  proposed by [Blichert-Toft and Albarède \(1997\)](#) were used for the calculation of  $\varepsilon\text{Hf}(t)$  values. The current depleted mantle has ratios of  $^{176}\text{Hf}/^{177}\text{Hf} = 0.28325$  and  $^{176}\text{Lu}/^{177}\text{Hf} = 0.0384$  ([Griffin et al., 2000](#)). The ratios of  $^{176}\text{Lu}/^{177}\text{Hf} = 0.015$  for average continent was reported by [Griffin et al. \(2002\)](#).

## References

- Andersen, T., 2002, Correction of common lead in U–Pb analyses that do not report  $^{204}\text{Pb}$ : *Chemical Geology*, v. 192, p. 59-79.
- Blichert-Toft, J., and Albarède, F., 1997, The Lu–Hf isotope geochemistry of chondrites and the evolution of the mantle-crust system: *Earth and Planetary Science Letters*, v. 148, p. 243-258.
- Griffin, W. L., Pearson, N. J., Belousova, E., Jackson, S. E., Van Acherbergh, E., O'Reilly, S. Y., and Shee, S. R., 2000, The Hf isotope composition of cratonic mantle: LAM-MC-ICPMS analysis of zircon megacrysts in kimberlites: *Geochimica et Cosmochimica Acta*, v. 64, no. 1, p. 133-147.
- Griffin, W. L., Wang, X., Jackson, S. E., Pearson, N. J., O'Reilly, S. Y., Xu, X., and Zhou, X., 2002, Zircon chemistry and magma mixing, SE China: In-situ analysis of Hf isotopes, Tonglu and Pingtan igneous complexes: *Lithos*, v. 61, p. 237-269.
- Hou, K., Li, Y., Zou, T., Qu, X., Shi, Y., and Xie, G., 2007, Laser ablation-MC-ICP-MS technique for Hf isotope microanalysis of zircon and its geological applications [in Chinese with English abstract]: *Acta Petrologica Sinica*, v. 23, no. 10, p. 2595-2604.
- Ludwig, K. R., 2003, *ISOPLOT 3.00: A Geochronological Toolkit for Microsoft Excel*: Berkeley Geochronology Center, California, Berkeley.
- Söderlund, U., Patchett, P. J., Vervoort, J. D., and Isachsen, C. E., 2004, The  $^{176}\text{Lu}$  decay constant determined by Lu–Hf and U–Pb isotope systematics of Precambrian mafic intrusions: *Earth and Planetary Science Letters*, v. 219, no. 3-4, p. 311-324, [https://doi.org/10.1016/s0012-821x\(04\)00012-3](https://doi.org/10.1016/s0012-821x(04)00012-3).
- Vermeesch, P., 2012, On the visualisation of detrital age distributions: *Chemical Geology*, v. 312-313, p. 190-194, <https://doi.org/10.1016/j.chemgeo.2012.04.021>.
- Wu, F., Yang, J., Wilde, S., Liu, X., Guo, J., and Zhai, M., 2007, Detrital zircon U–Pb and Hf isotopic constraints on the crustal evolution of North Korea: *Precambrian Research*, v. 159, no. 3-4, p. 155-177, <https://doi.org/10.1016/j.precamres.2007.06.007>.
- Xie, L., Zhang, Y., Zhang, H., Sun, J., and Wu, F., 2008, In situ simultaneous determination of trace elements, U–Pb and Lu–Hf isotopes in zircon and baddeleyite: *Science Bulletin*, v. 53, no. 10, p. 1565-1573, <https://doi.org/10.1007/s11434-008-0086-y>.
